# Supplementary material for: Shortwave surface radiation network for observing small-scale cloud inhomogeneity fields
Source: Copernicus journal article supplement (doi:10.5194/amt-9-1153-2016), 2016-03-18
Supplement: Supplementary file 1 [file amt-9-1153-2016-supplement.zip]

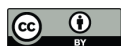

## *Supplement of*

# **Shortwave surface radiation network for observing small-scale cloud inhomogeneity fields**

**B. L. Madhavan et al.**

*Correspondence to:* Bomidi Lakshmi Madhavan (madhavan.bomidi@tropos.de)

- amt-9-1153-2016-supplement-title-page.pdf
- amt-2014-313-Supplement
  - README.txt
  - Supplement.pdf
  - movie01.avi
  - movie02.avi
  - movie03.avi

The copyright of individual parts of the supplement might differ from the CC-BY 3.0 licence.
