# Supplementary material for: Shortwave surface radiation network for observing small-scale cloud inhomogeneity fields
Source: Copernicus journal article supplement (doi:10.5194/amt-9-1153-2016), 2016-03-18
Supplement: Supplementary file 2 [file amt-9-1153-2016-supplement.zip]

Archive with 7 entries (6 files):
- amt-9-1153-2016-supplement-title-page.pdf
- amt-2014-313-Supplement/
- amt-2014-313-Supplement/movie01.avi
- amt-2014-313-Supplement/movie02.avi
- amt-2014-313-Supplement/Supplement.pdf
- amt-2014-313-Supplement/movie03.avi
- amt-2014-313-Supplement/README.txt
