# Supplementary material for: Shortwave surface radiation network for observing small-scale cloud inhomogeneity fields
Source: Copernicus journal article supplement (doi:10.5194/amt-9-1153-2016), 2016-03-18
Supplement: Supplementary file 2 [file amt-9-1153-2016-supplement.zip › amt-2014-313-Supplement/README.txt]

The movies in the supplementary information (i.e., movie01.avi, movie02.avi, movie03.avi) can be viewed on VLC media player, which is freely available for all platforms (Windows/Linux/Mac).    
